# Supplementary material for: MSH3 Homology and Potential Recombination Link to SARS-CoV-2 Furin Cleavage Site
Source: Frontiers journal article supplement (doi:10.3389/fviro.2022.834808), 2022-02-21
Supplement: Table_1.XLSX [file Table_1.XLSX]

## Sheet: Sheet 1 - C1872NU7016-Alignment
C1872NU7016-Alignment-Descriptions
Description	Scientific Name				Total Score	Query Cover	E value	Per. ident
Sequence 1 from Patent WO2021072035	Severe acute respiratory syndrome coronavirus 2	23601	CTCCTCGGCGGGCACGTAG	23619	38.2	1	0.16	100	MQ032643.1
JP 2017197545-A/7090: MODIFIED POLYNUCLEOTIDES FOR THE PRODUCTION OF ONCOLOGY-RELATED PROTEINS AND PEPTIDES	synthetic construct	2751	CTCCTCGGCGGGCACGTAG	2733	38.2	1	0.16	100	LZ959695.1
JP 2017197545-A/7089: MODIFIED POLYNUCLEOTIDES FOR THE PRODUCTION OF ONCOLOGY-RELATED PROTEINS AND PEPTIDES	synthetic construct	2778	CTCCTCGGCGGGCACGTAG	2760	38.2	1	0.16	100	LZ959694.1
Sequence 11652 from patent US 9587003		2751	CTCCTCGGCGGGCACGTAG	2733	38.2	1	0.16	100	KH664781.1
Sequence 11651 from patent US 9587003		2778	CTCCTCGGCGGGCACGTAG	2760	38.2	1	0.16	100	KH664780.1
Sequence 11652 from patent US 9301993		2751	CTCCTCGGCGGGCACGTAG	2733	38.2	1	0.16	100	KH007089.1
Sequence 11651 from patent US 9301993		2778	CTCCTCGGCGGGCACGTAG	2760	38.2	1	0.16	100	KH007088.1
Sequence 11652 from patent US 9255129		2751	CTCCTCGGCGGGCACGTAG	2733	38.2	1	0.16	100	HL613055.1
Sequence 11651 from patent US 9255129		2778	CTCCTCGGCGGGCACGTAG	2760	38.2	1	0.16	100	HL613054.1
Sequence 11652 from patent US 9216205		2751	CTCCTCGGCGGGCACGTAG	2733	38.2	1	0.16	100	HL457179.1
Sequence 11651 from patent US 9216205		2778	CTCCTCGGCGGGCACGTAG	2760	38.2	1	0.16	100	HL457178.1
Sequence 11652 from patent US 9149506		2751	CTCCTCGGCGGGCACGTAG	2733	38.2	1	0.16	100	HL240350.1
Sequence 11651 from patent US 9149506		2778	CTCCTCGGCGGGCACGTAG	2760	38.2	1	0.16	100	HL240349.1
JP 2015518816-A/7090: MODIFIED POLYNUCLEOTIDES FOR THE PRODUCTION OF ONCOLOGY-RELATED PROTEINS AND PEPTIDES	synthetic construct	2751	CTCCTCGGCGGGCACGTAG	2733	38.2	1	0.16	100	HZ246786.1
JP 2015518816-A/7089: MODIFIED POLYNUCLEOTIDES FOR THE PRODUCTION OF ONCOLOGY-RELATED PROTEINS AND PEPTIDES	synthetic construct	2778	CTCCTCGGCGGGCACGTAG	2760	38.2	1	0.16	100	HZ246785.1
