# Supplementary material for: MSH3 Homology and Potential Recombination Link to SARS-CoV-2 Furin Cleavage Site
Source: Frontiers journal article supplement (doi:10.3389/fviro.2022.834808), 2022-02-21
Supplement: Table_2.XLSX [file Table_2.XLSX]

## Sheet: Sheet 1 - C1C21E1V016-Alignment
C1C21E1V016-Alignment-Descriptions (1)
Description	Scientific Name				Total Score	Query Cover	E value	Per. ident
Severe acute respiratory syndrome-related coronavirus isolate H_SC_11 genome assembly, complete genome: monopartite	Severe acute respiratory syndrome-related coronavirus	23601	CTCCTCGGCGGGCACGTAG	23619	38.2	1	0.039	100	HG994860.1
Severe acute respiratory syndrome-related coronavirus isolate H_SC_10 genome assembly, complete genome: monopartite	Severe acute respiratory syndrome-related coronavirus	23601	CTCCTCGGCGGGCACGTAG	23619	38.2	1	0.039	100	HG994859.1
Severe acute respiratory syndrome-related coronavirus isolate H_SC_09 genome assembly, complete genome: monopartite	Severe acute respiratory syndrome-related coronavirus	23601	CTCCTCGGCGGGCACGTAG	23619	38.2	1	0.039	100	HG994858.1
Severe acute respiratory syndrome-related coronavirus isolate H_SC_08 genome assembly, complete genome: monopartite	Severe acute respiratory syndrome-related coronavirus	23601	CTCCTCGGCGGGCACGTAG	23619	38.2	1	0.039	100	HG994857.1
Severe acute respiratory syndrome-related coronavirus isolate H_SC_07 genome assembly, complete genome: monopartite	Severe acute respiratory syndrome-related coronavirus	23601	CTCCTCGGCGGGCACGTAG	23619	38.2	1	0.039	100	HG994856.1
Severe acute respiratory syndrome-related coronavirus isolate H_SC_06 genome assembly, complete genome: monopartite	Severe acute respiratory syndrome-related coronavirus	23601	CTCCTCGGCGGGCACGTAG	23619	38.2	1	0.039	100	HG994855.1
Severe acute respiratory syndrome-related coronavirus isolate H_SC_03 genome assembly, complete genome: monopartite	Severe acute respiratory syndrome-related coronavirus	23601	CTCCTCGGCGGGCACGTAG	23619	38.2	1	0.039	100	HG994854.1
Severe acute respiratory syndrome-related coronavirus isolate H_SC_02 genome assembly, complete genome: monopartite	Severe acute respiratory syndrome-related coronavirus	23601	CTCCTCGGCGGGCACGTAG	23619	38.2	1	0.039	100	HG994853.1
Severe acute respiratory syndrome-related coronavirus isolate H_SC_01 genome assembly, complete genome: monopartite	Severe acute respiratory syndrome-related coronavirus	23598	CTCCTCGGCGGGCACGTAG	23616	38.2	1	0.039	100	HG994852.1
