# Supplementary material for: MSH3 Homology and Potential Recombination Link to SARS-CoV-2 Furin Cleavage Site
Source: Frontiers journal article supplement (doi:10.3389/fviro.2022.834808), 2022-02-21
Supplement: Table_3.XLSX [file Table_3.XLSX]

## Sheet: Sheet 1 - C186C04F013-Alignment
C186C04F013-Alignment-Descriptions (1)
Description				Query Cover	E value	Per. ident	Query
Homo sapiens RNA polymerase II, I and III subunit H (POLR2H), transcript variant 12, mRNA	281	CCTCGGCGGGCACG	294	0.73	24	100	NM_001389582.1
Homo sapiens RNA polymerase II, I and III subunit H (POLR2H), transcript variant 11, mRNA	426	CCTCGGCGGGCACG	439	0.73	24	100	NM_001389581.1
Homo sapiens RNA polymerase II, I and III subunit H (POLR2H), transcript variant 16, mRNA	281	CCTCGGCGGGCACG	294	0.73	24	100	NM_001389586.1
Homo sapiens B cell linker (BLNK), transcript variant 8, non-coding RNA	441	CTCCTCGGCGGGCA	428	0.73	24	100	NR_047682.2
Homo sapiens B cell linker (BLNK), transcript variant 9, non-coding RNA	441	CTCCTCGGCGGGCA	428	0.73	24	100	NR_047683.2
Homo sapiens B cell linker (BLNK), transcript variant 7, non-coding RNA	446	CTCCTCGGCGGGCA	433	0.73	24	100	NR_047681.2
Homo sapiens B cell linker (BLNK), transcript variant 3, mRNA	441	CTCCTCGGCGGGCA	428	0.73	24	100	NM_001258440.2
Homo sapiens B cell linker (BLNK), transcript variant 5, mRNA	441	CTCCTCGGCGGGCA	428	0.73	24	100	NM_001258442.2
Homo sapiens RNA polymerase II, I and III subunit H (POLR2H), transcript variant 3, mRNA	599	CCTCGGCGGGCACG	612	0.73	24	100	NM_001278699.3
Homo sapiens B cell linker (BLNK), transcript variant 4, mRNA	441	CTCCTCGGCGGGCA	428	0.73	24	100	NM_001258441.2
Homo sapiens TBC1 domain family member 14 (TBC1D14), transcript variant 2, mRNA	2016	CTCCTCGGCGGGCA	2003	0.73	24	100	NM_001113361.2
Homo sapiens RNA polymerase II, I and III subunit H (POLR2H), transcript variant 2, mRNA	599	CCTCGGCGGGCACG	612	0.73	24	100	NM_006232.5
Homo sapiens B cell linker (BLNK), transcript variant 6, non-coding RNA	441	CTCCTCGGCGGGCA	428	0.73	24	100	NR_047680.2
Homo sapiens tripartite motif containing 17 (TRIM17), transcript variant 4, mRNA	891	CTCCTCGGCGGGCA	878	0.73	24	100	NM_001134855.2
Homo sapiens B cell linker (BLNK), transcript variant 2, mRNA	441	CTCCTCGGCGGGCA	428	0.73	24	100	NM_001114094.2
Homo sapiens TBC1 domain family member 14 (TBC1D14), transcript variant 4, mRNA	1173	CTCCTCGGCGGGCA	1160	0.73	24	100	NM_001286805.2
Homo sapiens tripartite motif containing 17 (TRIM17), transcript variant 2, mRNA	739	CTCCTCGGCGGGCA	726	0.73	24	100	NM_001024940.3
Homo sapiens Rho GTPase activating protein 45 (ARHGAP45), transcript variant 2, mRNA	925	CTCCTCGGCGGGCA	912	0.73	24	100	NM_001258328.4
Homo sapiens Rho GTPase activating protein 45 (ARHGAP45), transcript variant 1, mRNA	1049	CTCCTCGGCGGGCA	1036	0.73	24	100	NM_012292.5
Homo sapiens Rho GTPase activating protein 45 (ARHGAP45), transcript variant 5, mRNA	897	CTCCTCGGCGGGCA	884	0.73	24	100	NM_001321232.2
Homo sapiens Rho GTPase activating protein 45 (ARHGAP45), transcript variant 4, mRNA	538	CTCCTCGGCGGGCA	525	0.73	24	100	NM_001282335.3
Homo sapiens B cell linker (BLNK), transcript variant 1, mRNA	441	CTCCTCGGCGGGCA	428	0.73	24	100	NM_013314.4
Homo sapiens TBC1 domain family member 14 (TBC1D14), transcript variant 3, mRNA	1257	CTCCTCGGCGGGCA	1244	0.73	24	100	NM_001113363.2
Homo sapiens TBC1 domain family member 14 (TBC1D14), transcript variant 5, mRNA	1410	CTCCTCGGCGGGCA	1397	0.73	24	100	NM_001330638.2
Homo sapiens serine dehydratase (SDS), mRNA	308	CTCCTCGGCGGGCA	321	0.73	24	100	NM_006843.3
Homo sapiens tripartite motif containing 17 (TRIM17), transcript variant 1, mRNA	775	CTCCTCGGCGGGCA	762	0.73	24	100	NM_016102.4
Homo sapiens protein phosphatase 1 regulatory inhibitor subunit 1B (PPP1R1B), transcript variant 1, mRNA	292	CCTCGGCGGGCACG	305	0.73	24	100	NM_032192.4
Homo sapiens dispatched RND transporter family member 3 (DISP3), mRNA	976	CCTCGGCGGGCACG	963	0.73	24	100	NM_020780.2
Homo sapiens dual specificity phosphatase 4 (DUSP4), transcript variant 1, mRNA	679	CTCCTCGGCGGGCA	666	0.73	24	100	NM_001394.7
Homo sapiens TBC1 domain family member 14 (TBC1D14), transcript variant 1, mRNA	2102	CTCCTCGGCGGGCA	2089	0.73	24	100	NM_020773.3
PREDICTED: Homo sapiens TBC1 domain family member 14 (TBC1D14), transcript variant X5, mRNA	2330	CTCCTCGGCGGGCA	2317	0.73	24	100	XM_006713895.3
PREDICTED: Homo sapiens TBC1 domain family member 14 (TBC1D14), transcript variant X3, mRNA	2057	CTCCTCGGCGGGCA	2044	0.73	24	100	XM_005247986.3
PREDICTED: Homo sapiens TBC1 domain family member 14 (TBC1D14), transcript variant X1, mRNA	2231	CTCCTCGGCGGGCA	2218	0.73	24	100	XM_011513507.3
PREDICTED: Homo sapiens RNA polymerase II, I and III subunit H (POLR2H), transcript variant X4, mRNA	599	CCTCGGCGGGCACG	612	0.73	24	100	XM_017006636.2
PREDICTED: Homo sapiens RNA polymerase II, I and III subunit H (POLR2H), transcript variant X1, mRNA	599	CCTCGGCGGGCACG	612	0.73	24	100	XM_006713666.3
PREDICTED: Homo sapiens Rho GTPase activating protein 45 (ARHGAP45), transcript variant X2, mRNA	1049	CTCCTCGGCGGGCA	1036	0.73	24	100	XM_006722713.2
PREDICTED: Homo sapiens dispatched RND transporter family member 3 (DISP3), transcript variant X1, mRNA	780	CCTCGGCGGGCACG	767	0.73	24	100	XM_011541828.3
PREDICTED: Homo sapiens tripartite motif containing 17 (TRIM17), transcript variant X4, mRNA	813	CTCCTCGGCGGGCA	800	0.73	24	100	XM_011544211.3
PREDICTED: Homo sapiens tripartite motif containing 17 (TRIM17), transcript variant X3, mRNA	912	CTCCTCGGCGGGCA	899	0.73	24	100	XM_011544210.3
PREDICTED: Homo sapiens tripartite motif containing 17 (TRIM17), transcript variant X2, mRNA	823	CTCCTCGGCGGGCA	810	0.73	24	100	XM_006711779.3
PREDICTED: Homo sapiens tripartite motif containing 17 (TRIM17), transcript variant X1, mRNA	810	CTCCTCGGCGGGCA	797	0.73	24	100	XM_011544209.3
PREDICTED: Homo sapiens TBC1 domain family member 14 (TBC1D14), transcript variant X9, mRNA	1472	CTCCTCGGCGGGCA	1459	0.73	24	100	XM_017008480.1
PREDICTED: Homo sapiens TBC1 domain family member 14 (TBC1D14), transcript variant X8, mRNA	1174	CTCCTCGGCGGGCA	1161	0.73	24	100	XM_017008479.1
PREDICTED: Homo sapiens TBC1 domain family member 14 (TBC1D14), transcript variant X7, mRNA	1342	CTCCTCGGCGGGCA	1329	0.73	24	100	XM_011513513.2
PREDICTED: Homo sapiens TBC1 domain family member 14 (TBC1D14), transcript variant X4, mRNA	1966	CTCCTCGGCGGGCA	1953	0.73	24	100	XM_017008477.1
PREDICTED: Homo sapiens RNA polymerase II, I and III subunit H (POLR2H), transcript variant X6, mRNA	590	CCTCGGCGGGCACG	603	0.73	24	100	XM_017006637.1
PREDICTED: Homo sapiens dispatched RND transporter family member 3 (DISP3), transcript variant X9, mRNA	976	CCTCGGCGGGCACG	963	0.73	24	100	XM_011541835.2
PREDICTED: Homo sapiens dispatched RND transporter family member 3 (DISP3), transcript variant X8, misc_RNA	976	CCTCGGCGGGCACG	963	0.73	24	100	XR_001737342.1
PREDICTED: Homo sapiens dispatched RND transporter family member 3 (DISP3), transcript variant X7, mRNA	976	CCTCGGCGGGCACG	963	0.73	24	100	XM_011541833.2
PREDICTED: Homo sapiens dispatched RND transporter family member 3 (DISP3), transcript variant X6, mRNA	976	CCTCGGCGGGCACG	963	0.73	24	100	XM_011541832.2
PREDICTED: Homo sapiens dispatched RND transporter family member 3 (DISP3), transcript variant X5, mRNA	976	CCTCGGCGGGCACG	963	0.73	24	100	XM_011541831.2
PREDICTED: Homo sapiens dispatched RND transporter family member 3 (DISP3), transcript variant X4, mRNA	976	CCTCGGCGGGCACG	963	0.73	24	100	XM_011541830.2
PREDICTED: Homo sapiens dispatched RND transporter family member 3 (DISP3), transcript variant X2, misc_RNA	976	CCTCGGCGGGCACG	963	0.73	24	100	XR_946717.2
PREDICTED: Homo sapiens tripartite motif containing 17 (TRIM17), transcript variant X5, mRNA	912	CTCCTCGGCGGGCA	899	0.73	24	100	XM_017001419.1
PREDICTED: Homo sapiens Rho GTPase activating protein 45 (ARHGAP45), transcript variant X1, mRNA	897	CTCCTCGGCGGGCA	884	0.73	24	100	XM_011527858.1
PREDICTED: Homo sapiens TBC1 domain family member 14 (TBC1D14), transcript variant X2, mRNA	2140	CTCCTCGGCGGGCA	2127	0.73	24	100	XM_011513508.1
PREDICTED: Homo sapiens tripartite motif containing 17 (TRIM17), transcript variant X6, misc_RNA	600	CTCCTCGGCGGGCA	587	0.73	24	100	XR_949144.1
PREDICTED: Homo sapiens TBC1 domain family member 14 (TBC1D14), transcript variant X6, misc_RNA	1912	CTCCTCGGCGGGCA	1899	0.73	24	100	XR_241653.1
